# Supplementary material for: Exploring the virulence gene interactome with CRISPR/dCas9 in the human malaria parasite
Source: PubMed Central journal article supplement (PMC7440042; doi:10.15252/msb.20209569), 2020-08-20

**Figure 4A**

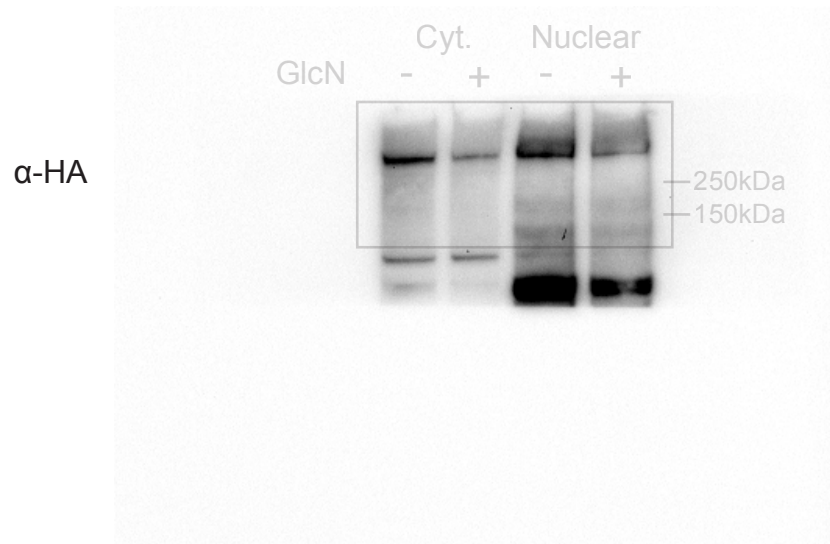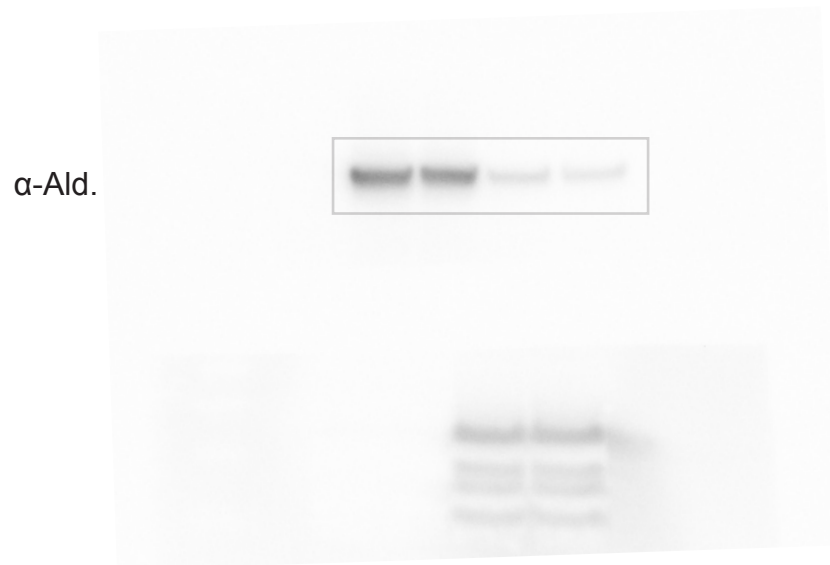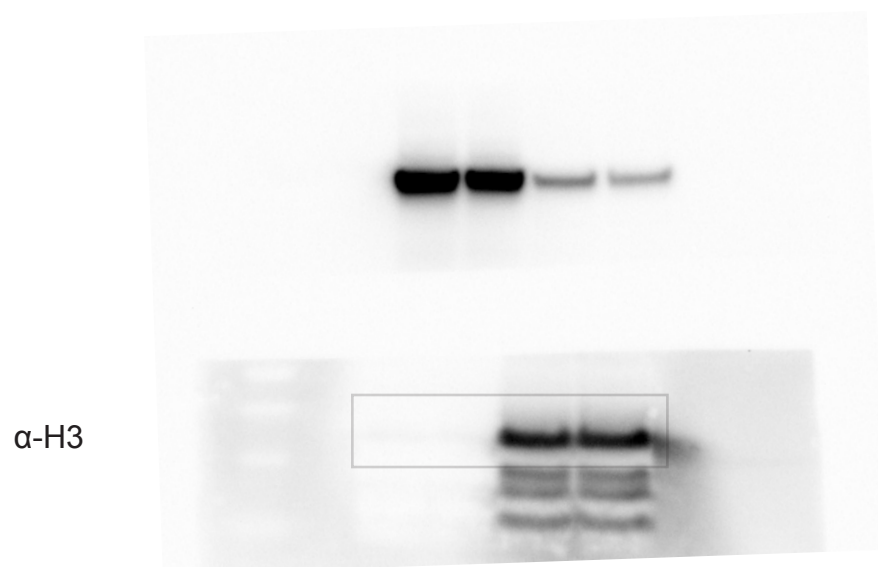

Supplement: MSB-16-e9569-s017.pdf [file MSB-16-e9569-s017.pdf]
